# Supplementary material for: MnO2 nanoarrays: an efficient catalyst electrode for nitrite electroreduction toward sensing and NH3 synthesis applications
Source: Royal Society of Chemistry journal article supplement (doi:10.1039/c8cc05837g), 2018-01-01
Supplement: c8cc05837g1.pdf [file c8cc05837g1.pdf]

## Electronic Supplementary Information

### Experimental section

**Materials:** Condensed acetic acid ( $\text{CH}_3\text{COOH}$ ), sodium hydroxide ( $\text{NaOH}$ ), hydrochloric acid ( $\text{HCl}$ ), sodium sulfate ( $\text{Na}_2\text{SO}_4$ ), and ethanol ( $\text{C}_2\text{H}_5\text{OH}$ ) were purchased from Chengdu Kelong Chemical Reagent Factory. Manganese (II) acetate ( $\text{Mn}(\text{CH}_3\text{COO})_2$ ), potassium chlorate ( $\text{KClO}_3$ ) were purchased from Aladdin Ltd. (Shanghai, China). TM purchased from Hongshan District, Wuhan Instrument Surgical Instruments business. The water used throughout all experiments was purified through a Millipore system. All chemicals were used as received without further purification.

**Preparation of  $\text{MnO}_2$  NA/TM:**  $\text{MnO}_2$  NA/TM was prepared as follows. 5 mL  $\text{CH}_3\text{COOH}$  was diluted into 70 mL water. Then, 5 mmol  $\text{Mn}(\text{CH}_3\text{COO})_2$  and 8.75 mmol  $\text{KClO}_3$  were added to the above solution. Then the solution was transferred into a Teflon-lined stainless autoclave (100 mL), and a piece of TM was immersed into the autoclave contained solution. The autoclave was sealed and maintained at 160 °C for 12 h in an electric oven. After the autoclave cooled down naturally to room temperature, the resulting  $\text{MnO}_2$  NA/TM was taken out and washed with deionized water and  $\text{C}_2\text{H}_5\text{OH}$  several times alternatively, then dried in air at 60 °C for 6 h.

### Characterizations

Powder X-ray diffraction (XRD) data were acquired on a RigakuD/MAX 2550 diffractometer with Cu K $\alpha$  radiation ( $\lambda=1.5418$  Å). Scanning electron microscopy (SEM) measurements were performed on a Hitachi S-4800 field emission scanning electron microscope at an accelerating voltage of 20 kV. Transmission electron microscopy (TEM) measurements were made on a Hitachi H-8100 electron microscopy (Hitachi, Tokyo, Japan) with an accelerating voltage of 200 kV. X-ray photoelectron spectroscopy (XPS) measurements were carried out on an ESCALABMK II X-ray photoelectron spectrometer using Mg as the exciting source.

### Electrochemical measurements

Electrochemical measurements were performed with a CHI 660E electrochemical analyzer (CH Instruments, Inc., Shanghai) in a conventional three electrode system, using  $\text{MnO}_2$  NA/TM as working electrode, platinum wire as counter electrode and saturated  $\text{Ag}/\text{AgCl}$  as

reference electrode. All tests were carried out at room temperature.

### **Determination of NH<sub>3</sub>**

The produced NH<sub>3</sub> was detected with indophenol blue by UV-Vis absorption spectra. In detail, 4 mL electrolyte was removed from the cathodic chamber and added into 50  $\mu$ L oxidizing solution containing NaClO ( $\rho_{\text{Cl}} = 4 \sim 4.9$ ) and NaOH (0.75 M), followed by adding 500  $\mu$ L coloring solution containing 0.4 M C<sub>7</sub>H<sub>6</sub>O<sub>3</sub> and 0.32 M NaOH, and 50  $\mu$ L catalyst solution (0.1 g Na<sub>2</sub>[Fe(CN)<sub>5</sub>NO]·2H<sub>2</sub>O diluted to 10 mL with deionized water) in turn. Absorbance measurements were performed after 2 h at  $\lambda = 655$  nm. The concentration-absorbance curve was calibrated using standard NH<sub>4</sub>Cl solution with NH<sub>4</sub><sup>+</sup> concentrations of 0.0, 0.1, 0.2, 0.3, 0.4, 0.5, 0.6, 0.7, 0.8, 0.9, and 1.0  $\mu\text{g mL}^{-1}$  in 0.1 M Na<sub>2</sub>SO<sub>4</sub>. The fitting curve ( $y = 0.7036x + 0.029$ ,  $R^2 = 0.9996$ ) shows good linear relation of absorbance value with NH<sub>3</sub> concentration by three times independent calibrations. NH<sub>3</sub> formation efficiency was calculated using the following equation: NH<sub>3</sub> formation efficiency =  $(c_{\text{NH}_3} \times V) / (17 \times 5)$ , where  $c_{\text{NH}_3}$  is the measured NH<sub>3</sub> concentration, V is the volume of the cathodic reaction for NH<sub>3</sub> collection, 17 is the relative molecular mass of NH<sub>3</sub> and 5 is the molar mass of nitrite added.

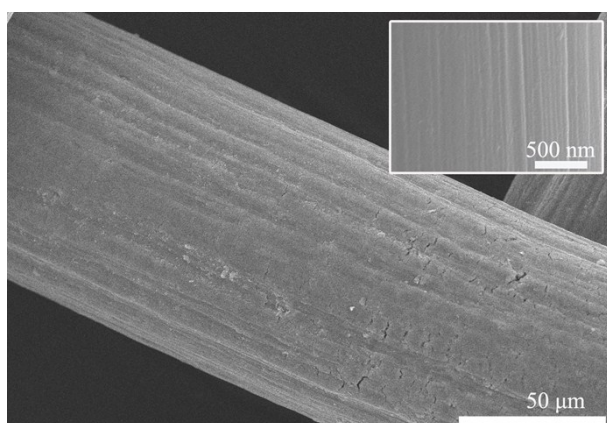

**Fig. S1.** SEM images of TM.

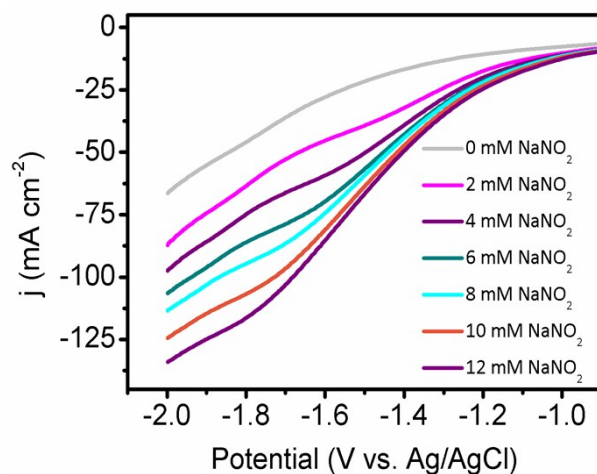

**Fig. S2.** LSV curves for MnO<sub>2</sub>/TM in 0.1 M NaSO<sub>4</sub> with the presence of varied NaNO<sub>2</sub> concentrations: 0, 2, 4, 6, 8, 10, and 12 mM (from inner to outer) at a scan rate of 30 mV s<sup>-1</sup>, with graphite rod as counter electrode and Ag/AgCl as reference electrode.

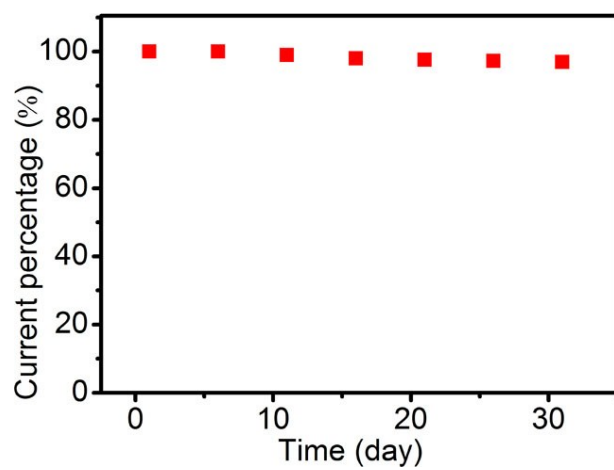

**Fig. S3.** Stability of MnO<sub>2</sub> NA/TM electrode for testing 1.0 mM NaNO<sub>2</sub> in 0.1 M NaSO<sub>4</sub>.

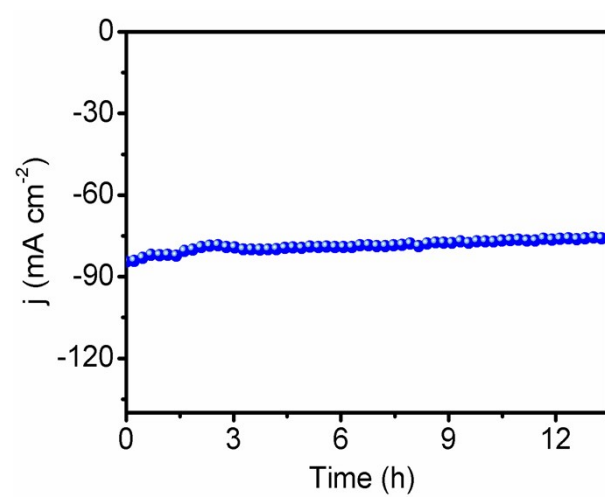

**Fig. S4.** Continuous stability of MnO<sub>2</sub> NA/TM electrode for testing 5.0 mM NaNO<sub>2</sub> in 0.1 M NaSO<sub>4</sub>.

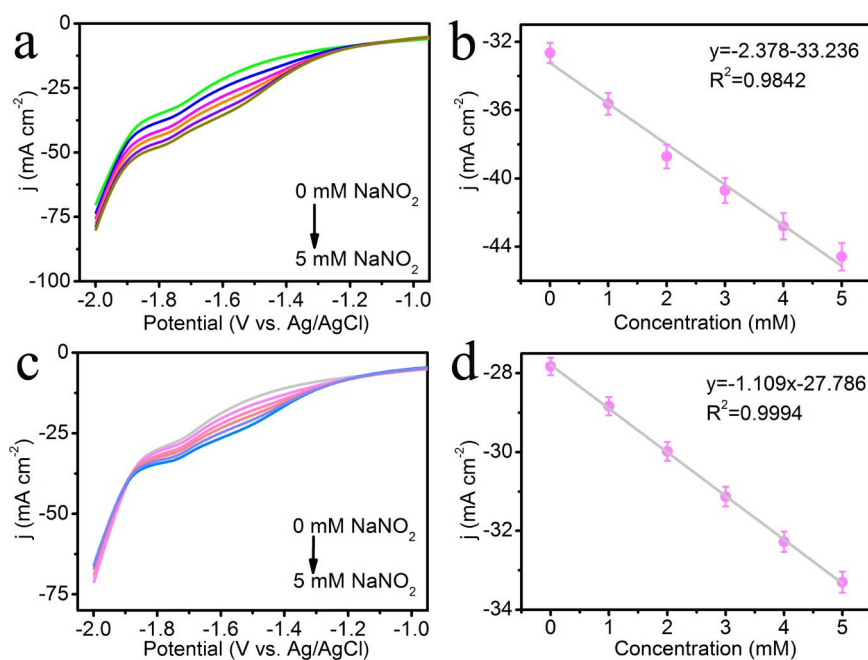

**Fig. S5.** (a, c) LSV curves of MnO<sub>2</sub> NA/TM in river water and tap water at  $-1.75$  V in  $0.1$  M Na<sub>2</sub>SO<sub>4</sub> with the presence of varied NaNO<sub>2</sub> concentration: 0, 1, 2, 3, 4, and 5 mM from inner to outer (scan rate:  $30 \text{ mV s}^{-1}$ ), respectively. (b, d) Corresponding calibration curves of river water and tap water, respectively.

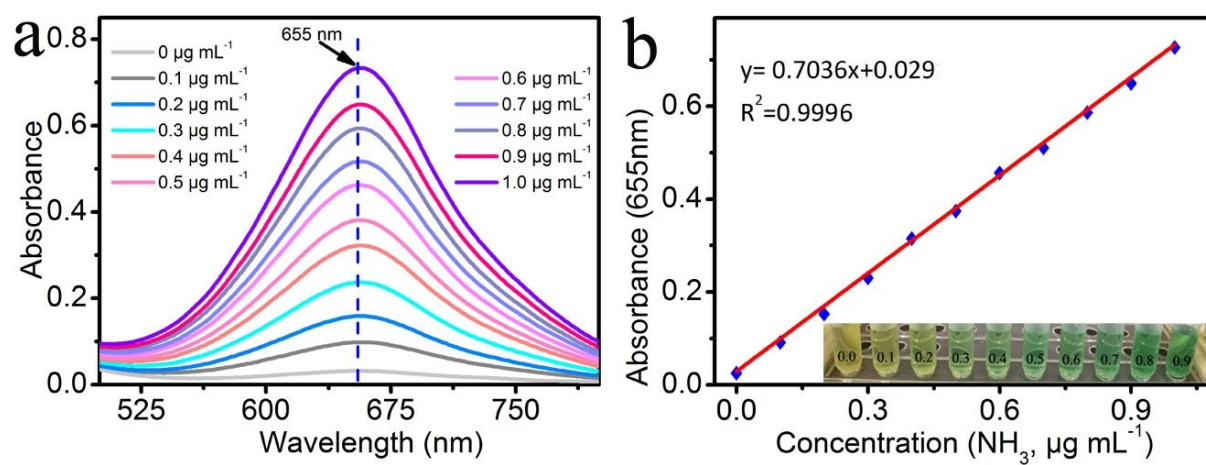

**Fig. S6.** (a) UV-Vis absorption spectra of indophenol assays with  $\text{NH}_3$  after incubated for 2 h at room temperature. (b) Calibration curve used for estimation of  $\text{NH}_3$ .



**Table S1.** Comparison of the MnO<sub>2</sub> NA/TM performances for nitrite with reported electrocatalysts.

| <b>catalyst</b>                        | <b>sensitivity</b>                              | <b>linear range<br/>(<math>\mu</math>M)</b> | <b>detection<br/>limit(<math>\mu</math>M)</b> | <b>ref.</b> |
|----------------------------------------|-------------------------------------------------|---------------------------------------------|-----------------------------------------------|-------------|
| Pd/SWCNT                               | 417 $\mu$ A mM <sup>-1</sup> cm <sup>-2</sup>   | 2–238                                       | 0.25                                          | 1           |
|                                        | 192 $\mu$ A mM <sup>-1</sup> cm <sup>-2</sup>   | 283–1230                                    |                                               |             |
| Fe <sub>2</sub> O <sub>3</sub> /rGO    | 204 $\mu$ A mM <sup>-1</sup> cm <sup>-2</sup>   | 0.05–780                                    | 0.015                                         | 2           |
| Cu-NDs/RGO                             | 214 $\mu$ A mM <sup>-1</sup> cm <sup>-2</sup>   | 125–13000                                   | 0.4                                           | 3           |
| nano-Au/Ch                             | 0.354 $\mu$ A mM <sup>-1</sup>                  | 0.4–750                                     | 0.1                                           | 4           |
| rGO–Co <sub>3</sub> O <sub>4</sub> @Pt | 0.026 $\mu$ A mM <sup>-1</sup>                  | 10–650                                      | 1.73                                          | 5           |
| AuNPs-ERGO                             | 5.38 $\mu$ A mM <sup>-1</sup> cm <sup>-2</sup>  | Up to 3.38                                  | 0.133                                         | 6           |
| f-ZnO@rFGO                             | /                                               | 10–8000                                     | 33                                            | 7           |
| MnO <sub>2</sub> NA/TM                 | 10301 $\mu$ A mM <sup>-1</sup> cm <sup>-2</sup> | 1.0–5000                                    | 0.0015                                        | this work   |

## References

1. X. H. Pham, C. A. Li, K. N. Han, B. C. Huynh-Nguyen, T. H. Le, E. Ko, J. H. Kim and G. H. Seong, *Sens. Actuators B Chem.*, 2014, **193**, 815–822.
2. S. Radhakrishnan, K. Krishnamoorthy, C. Sekar, J. Wilson and S. J. Kim, *Appl. Catal. B Environ.*, 2014, **148**, 22–28.
3. D. Zhang, Y. Fang, Z. Miao, M. Ma, X. Du, S. Takahashi, J.-i. Anzai and Q. Chen, *Electrochim. Acta*, 2013, **107**, 656–663.
4. P. Wang, Z. Mai, Z. Dai, Y. Li and X. Zou, *Biosens. Bioelectron.*, 2009, **24**, 3242–3247.
5. M. M. Shahid, P. Rameshkumar, A. Pandikumar, H. N. Lim, Y. H. Ng and N. M. Huang, *J. Mater. Chem. A*, 2015, **3**, 14458–14468.
6. S. L. Ting, C. X. Guo, K. C. Leong, D.-H. Kim, C. M. Li and P. Chen, *Electrochim. Acta*, 2013, **111**, 441–446.
7. A. R. Marlinda, A. Pandikumar, N. Yusoff, N. M. Huang and H. N. Lim, *Microchim. Acta*, 2015, **182**, 1113–1122.
